**Title: Characteristics of those most vulnerable to employment changes during the COVID-19 pandemic: a nationally representative cross-sectional study in Wales**

**Authors and Affiliations**

Benjamin J Gray<sup>1</sup>, Richard G Kyle<sup>1</sup>, Alisha R Davies<sup>1</sup>

<sup>1</sup> Research and Evaluation Division, Public Health Wales, Cardiff, UK

Corresponding Author

Dr Benjamin J Gray

Research and Evaluation Division, Knowledge Directorate, Public Health Wales,

Number 2 Capital Quarter, Tyndall Street, Cardiff, CF10 4BZ

Email: [Benjamin.Gray@wales.nhs.uk](mailto:Benjamin.Gray@wales.nhs.uk)

## **Abstract**

**Background** The public health response to the SARS-CoV-2 (COVID-19) pandemic has had a detrimental impact on employment and there are concerns the impact may be greatest amongst the most vulnerable. We examined the characteristics of those who experienced changes in employment status during the initial phase of the pandemic.

**Methods** A cross-sectional, nationally representative household survey of the working age population (18-64 years) in Wales in June 2020. A total of 1,382 adults responded (6.9% response rate). Employment outcomes between February and May/June 2020 were (i) no change in employment status, (ii) a change in employment, (iii) unemployment, and (iv) furlough. Chi-squared tests and logistic regression models examined associations between demographics, health status and employment outcomes.

**Results** Of the working age population in paid employment in February 2020, 3.2% were unemployed and 32.0% had been placed on furlough by June 2020. Groups more likely to be placed on furlough included younger (18-39 years) and older (50-64 years) workers, people from more deprived areas, in lower skilled jobs, living with pre-existing health conditions and from households with less financial security. Groups in poorer health (not good general health, low mental wellbeing) and from households containing a child or with less financial security were more likely to experience unemployment.

**Conclusion** A number of vulnerable population groups were observed to experience detrimental employment outcomes during the initial stage of the COVID-19 pandemic. Targeted support is needed to mitigate against both the direct impacts on employment, and indirect impacts on financial insecurity and health.

## Introduction

Employment is a wider determinant of health, and the links between good employment and better health outcomes are well established [1,2]. The response to the current global pandemic caused by SARS-CoV-2 is already having a significant impact on people's ability to work and employment status. In the United Kingdom (UK) estimates suggest a loss of 175.3 million weekly working hours between March to May 2020 compared to the previous year [3], and the unemployment rate reached 4.5% in August 2020 - a three year high [4]. Global estimates suggest that up to 25 million jobs could be lost as a result of the COVID-19 pandemic [5].

In the UK, younger people were more likely to be away from paid work during "lockdown"[6], and although economic interventions such as the Coronavirus Job Retention Scheme (also known as 'furlough') prevented mass redundancies initially [7], over the last quarter (June-August 2020), a record 114,000 redundancies were recorded [8]. Typically, mass unemployment events disproportionately impact the younger and older age groups [9–11], and those with lower skills or underlying health conditions are at more risk of exiting the labour market in the longer term. Predictions have suggested that job losses will be greatest within the retail and hospitality sectors [12,13] and women, young people, and the lowest paid are at particular risk of unemployment in this COVID-19 recession [13].

Identifying the groups most vulnerable to changes in employment during the COVID-19 pandemic is important, to better develop and target the health, re-employment and social support needed to prevent a longer term detrimental impact on societal health [9]. Emerging UK employment data has raised concerns about the disproportionate impact on specific demographic groups. We investigated the impact of COVID-19 on employment in the initial

phases of the pandemic as well as observed differences by underlying health and household financial security in Wales.

## **Methods**

### *Study Design*

The *COVID-19 Employment and Health in Wales Study* is a nationally representative cross-sectional online household survey undertaken between 25 May 2020 and 22 June 2020. The Health Research Authority approved the study (IRAS: 282223).

### *Participants*

Individuals were eligible to participate if they were resident in Wales, aged 18-64 years, and in employment in February 2020. Those in full time education were not eligible to participate.

### *Sample size calculation*

In order to ensure the sample was representative of the Welsh population a stratified random probability sampling framework by age, gender, and deprivation quintile was used. A target sample size of 1,250 work age adults was set based on previous national surveys [14] to provide an adequate sample across socio-economic groups. To achieve a sample size of 1,250, a total of 20,000 households were invited to participate. These invitation figures were based on the proportion of eligible working age households in Wales and informed by the most recent mid-year population estimates and UK Labour Force Survey projections (figures for 2017 [15,16]). The 20,000 sample included a main sample of 15,000 and a boosted sample of 5,000 of those in the lower deprivation quintiles to ensure representation from the most deprived populations.

### *Recruitment*

Each selected household was sent a survey pack containing an invitation letter and participant information sheet. The invitation asked the eligible member of the household with the next birthday to participate in the survey. It included instructions on how to access the online questionnaire, by entering a unique reference number provided in the letter. The letter highlighted the value of responding to the survey, that participation was voluntary, responses would be confidential and provided an email and Freephone telephone number to contact for further information or to inform the project team that they did not wish to participate. All exclusions were removed from the reminder mailing, which was posted 10 days after the initial invitation.

In total, 1,019 responses were received from the 15,000 base sample (6.8% response rate) and 273 responses received from the booster sample (5.5% response rate) providing a provisional sample of 1,382 respondents (6.9% overall response rate). The majority of the responses were online questionnaires (n=1370, 99.1%), with an additional six paper and six telephone questionnaires. During data cleaning, three individuals had not completed the question on employment contract and were excluded from the study, leaving a final sample of 1,379 for analysis.

### *Questionnaire Measures*

The employment details were collected at two time points (February and at date of questionnaire completion in May/June 2020). Questions on employment including contract type, rights, wages and treatment were based on the Employment Precariousness Scale (EPRES; [17]) and data on job role and associated skill level was determined using the current Standard Occupational Classification for the UK (SOC 2020; [18]).

Explanatory variables included; socio-demographics (gender, age group, and deprivation quintile assigned based on postcode of residence using the Welsh Index of Multiple Deprivation (WIMD [19])); individual self-reported health status included general health and pre-existing health conditions (defined using validated questions from the National Survey for Wales [20] and mental wellbeing (determined using the Short Version of the Warwick Edinburgh Mental Wellbeing Score [21]). We determined low mental wellbeing as 1 standard deviation below the mean score. Household factors were also collected including income covering basic needs [17], and child/ren in household. More detailed information on the questionnaire is provided in Supplementary Table A

### *Statistical analysis*

Estimates of the proportion of the ‘working age’ population (aged 18-64 years) in Wales were based on the population sample (n=1,379), weighted to the demographic distribution (age, gender and deprivation) of the Welsh population (mid-year 2018 population estimates [16]).

Employment outcomes of interest were: (i) no changes in employment, (ii) a change in employment status; covering new job with same employer, new job with new employer and becoming self-employed, (iii) unemployment, and (iv) being placed on furlough.

Estimates of the proportion of the Welsh working age population who experienced no change in employment status, a change in employment status or becoming unemployed since February 2020 was carried out on those ‘in paid employment’ as of February 2020 (n=1,229). Estimates of the proportion of the Welsh working age population on furlough was a sub group analysis of those ‘in paid employment’ as of February 2020 (N=1,030). This was calculated as the

adjusted proportion determined using a generalised linear model and reported as estimated marginal means and 95% confidence intervals (controlling for gender, age group and deprivation quintiles).

To examine differences in employment outcomes across population groups we tested the relationships between employment outcomes and the explanatory variables using Chi-squared tests. Multivariate logistic regression adjusted for gender, age group and deprivation quintiles was also performed to examine the association between the explanatory variables and changes in employment status, reported as adjusted Odds Ratios (aOR) and 95% confidence intervals. A p-value of <0.05 was considered statistically significant.

## **Results**

### *Changes in employment status*

Weighted prevalence estimates suggest that 91.0% of the Welsh working age population had no change to their main source of employment and 5.9% of the Welsh working age population experienced a change to their main employment from February to May/June 2020 (Table 1 and Table 3).

### *Characteristics of those unemployed*

Weighted prevalence estimates suggest that 3.2% of the Welsh working age population became unemployed from February to May/June 2020 (Table 1 and Table 3). There was no statistically significant difference in unemployment by gender or age group, but there was evidence to suggest that lower skilled jobs were more affected (Employment Skill Level 2 (second lowest),

Table 3). Of those unemployed, individuals were 3.41 [95% CI 1.29-7.83] times more likely to be employed in Skill Level 2 roles compared to Skill Level 4 professions (Table 4).

A higher proportion of those with low mental wellbeing reported unemployment compared to those with average mental wellbeing (10.5% and 2.3% respectively;  $p < 0.001$ ; Table 3). Of those unemployed, these individuals were twice as likely to report poorer general health (aOR 2.05 [95% CI 1.02-4.14]; Table 4) and five times more likely to report low mental wellbeing (aOR 5.14 [95% CI 2.57-10.29; Table 4]).

Experiencing unemployment was reported more frequently in those individuals whose households are struggling financially with basic needs (16.7%) compared to 2.2% of those with no financial struggles ( $p < 0.001$ ; Table 3), and effecting households with children. Of those unemployed, individuals were over 10 times more likely to be struggling financial with basic needs (aOR 10.76 [95% CI 5.16-22.43], and twice as likely to be from a household containing at least one child (aOR 2.38 [95% CI 1.16-4.88]; Table 4).

#### *Characteristics of those furloughed*

One third (32.0% [95% CI 28.1%-36.0%]) of those in paid employment in February 2020 reported being placed on furlough (up to May/June 2020). The highest proportion of respondents on furlough was in the youngest age group (18-29 years; 39.5% [95% CI 31.8%-47.3%]), decreasing to 20.0% [95% CI 14.7%-25.4%] in the 40-49 years age group and increasing to 33.9% [95% CI 26.3%-41.6%] in 60-64 years age group (Figure 1A). Of those furloughed, individuals were 3.01 [95% CI 1.99-4.57] and 2.02 [95% CI 1.17-3.47] times more likely to be from the youngest (18-29 years) or oldest (60-64 years) age groups, respectively, when compared to those aged 40-49 years (Table 2). The highest proportion on furlough was



evident amongst the most deprived communities (33.4% [95% CI 27.3-39.5%]) and declined as a gradient across deprivation quintiles to 21.6% [95% CI 15.6%-27.55] in the most affluent (Figure 1A). Compared to the most affluent quintile (Quintile 5), those individuals furloughed were over 1.5 times more likely to be resident in Quartiles 1-4 (Table 2).

Lowest skill workers (42.2% [95% CI 29.4%-55.0%]) had the highest proportions on furlough and this also decreased as a gradient with increasing skill level to 16.6% [95% CI 12.1%-21.1%] amongst the highest skilled workers (Figure 1B). Of those placed on furlough, individuals were at least 3.5 times more likely to have lower skilled jobs compared to the highest skilled group (Table 4).

A higher proportion of individuals reporting low mental wellbeing (36.6% [95% CI 27.9%-45.4%]) had been placed on furlough compared to those with average mental wellbeing (26.8% [95%CI 23.7%-29.9%];  $p < 0.05$ ; Figure 1C). Of those individuals placed on furlough, individuals were 1.46 [95% CI 1.09-1.95] times more likely to report a pre-existing condition compared to not reporting an underlying medical condition (Table 4).

Of those individuals placed on furlough, they were twice (aOR 2.54 [95% CI 1.89-3.41]) as likely to be from households struggling financially to meet basic needs (Table 4).

## **Discussion**

This is the first nationally representative survey in Wales that examines the associations between underlying health status and employment outcomes within the COVID-19 pandemic. The findings provide unique insights into the population groups experiencing societal harms [22] as a result of the indirect effect of COVID-19 on employment. People who are younger

(18-39 years), older (50 to 64 years), living in the most deprived communities, low skilled workers, and those with less financial security are more likely to experience employment harms as a result of the COVID-19 pandemic. Our study therefore identifies vulnerable groups that are ‘at risk’ of future jobs losses, and also reveals the disproportionate experiences of population subgroups in relation to unemployment experienced in the early part of the pandemic.

These findings are consistent with initial evidence from other parts of the UK in relation to the at-risk populations that have been furloughed, notably, those in certain age groups (18-39 years and 50 years and older) and those in lower skilled jobs [7,12,13]. We reported approximately 3% of the population in Wales became unemployed during the first 3-4 months of the pandemic, and 32% of those in employment have been placed on furlough. These furlough estimates are comparable to other data from the same time period which indicate 29% of jobs in Wales have been furloughed [23] and 31% of the jobs in the UK overall [24]. Of concern, however, is the disproportionate impact on vulnerable groups in the population that are currently supported by the Coronavirus Job Retention Scheme (‘furlough’). Not all individuals placed on furlough (and subsequent job retention schemes) will ultimately lose their jobs, but there is the potential for the impact on employment and health to be greatest amongst the most vulnerable sub-populations when this scheme and its planned replacement, the Job Support Scheme ceases. Evidence indicates that pandemics have the potential to exacerbate inequalities [11,25,26], especially within the most deprived communities and our findings suggest COVID-19 will have a similar impact.

Unemployment is also known to have a negative impact on an individual’s own health, such as poorer mental health outcomes [27–29]. Our data confirms this association. Higher levels

of unemployment and furlough were observed among those reporting low mental wellbeing. This worrying finding warrants further investigation and intervention as, although causality cannot be established through our study, it may reflect a consequence of unemployment or furlough during the pandemic rather than a pre-existing state. Being, or in the case of our study, becoming unemployed during a recession can worsen levels of psychological distress [30,31]. Our findings also suggest that those with pre-existing health conditions disproportionately experienced job loss in the early part of the pandemic. This echoes a pre-COVID 19 European study where those with poorer mental and physical health were at greater risk of job losses [32]. Addressing poorer health outcomes associated with poverty were already a public health priority before the COVID-19 pandemic [33,34]. Our results suggest households struggling financially to meet basic needs have been disproportionately impacted by unemployment during the early part of the pandemic. In addition, considering the wider family unit, individuals who reported job losses were more likely to live in households with a child. A change in an individual's employment and financial status has potential for wider harm to other members in the household, including children [35,36].

Our study helps to inform strategies and interventions to support these group to retain and/or secure good employment by identifying the vulnerable groups who have already disproportionately experienced harm from the early part of the pandemic. Uncertainties surrounding the global post-COVID labour market remain and although job retention schemes in place in many countries across the world still have some months to run these are economic rather than health-driven solutions. The potential for long-term negative impacts on health and wellbeing is evident in our study and health-aligned solutions may be required to mitigate these negative consequences. It is also important to remember that job insecurity itself, even if only perceived, can also have negative health consequences [37,38]. Furthermore, given poverty

and health are inextricably linked [33–36], the higher levels of furlough we observed among households who reported struggling financially to cover basic needs, requires attention. Social support systems and targeted initiatives to address inequalities in access to the labour market are needed by those potentially facing unemployment. Our study underscores the need to draw public health professionals and practices into the heart of debates around economic recovery and restructuring to ensure wider determinants of health and health inequalities are addressed [39].

### *Study limitations*

Our study has two main limitations. First, the cross-sectional design of the survey means that the observations demonstrate an association rather than causality. For example, caution is needed in interpretation of some of the findings in relation to mental wellbeing due to the data collection being at one time point and it is not known if low mental wellbeing was evident before. Second, although weighted to the population, females and the older age groups are over represented in our sample compared to the Welsh population, whereas deprivation quintiles are broadly representative except for the middle-to-high quintiles (Quintiles 3 and 4). In some instances, questionnaire responses will have been more heavily weighted than others. However, the consistencies within our data and national data (where comparators are available) suggest that our findings are generalisable.

### **Conclusion**

Furlough in the early part of the COVID-19 pandemic disproportionately impacted several population groups including those with pre-existing health conditions, financial struggles, and lower skilled job roles, the youngest (18-29 years) and oldest (60-64 years) age groups, and people living in deprived communities. A social gradient was observed across deprivation and

worker skill level with those living in the most deprived areas and working in the lowest skilled jobs being more likely to be furloughed. Furlough or unemployment was also associated with low mental wellbeing, and people experiencing job loss were also more likely to be individuals with poorer general health or from households struggling financially or containing at least one child. Interventions to support economic recovery need to target the groups identified here as most susceptible to the emerging harms of the pandemic. They should also take account of the links between employment and health confirmed by our study to ensure that health and wealth inequalities are not exacerbated by COVID-19 or the economic response to the pandemic.

### **Conflicts of Interest**

The authors wish to declare no competing interests.

### **Acknowledgements**

The authors express their gratitude to MEL Research who completed the data collection for this study and to the people from across Wales who completed the survey. We would also like to acknowledge our colleagues James Bailey and Dr Jiao Song for their guidance and advice in the initial stages of the manuscript.

## References

- 1 Van Aerden K, Puig-Barrachina V, Bosmans K, *et al.* How does employment quality relate to health and job satisfaction in Europe? A typological approach. *Soc Sci Med* 2016;**158**:132–40.
- 2 Van Der Noordt M, IJzelenberg H, Droomers M, *et al.* Health effects of employment: A systematic review of prospective studies. *Occup Environ Med* 2014;**71**:730–6.
- 3 Office for National Statistics. Employment in the UK: July 2020. 2020.<https://www.ons.gov.uk/employmentandlabourmarket/peopleinwork/employmentandemployeetypes/bulletins/employmentintheuk/july2020> (accessed 15 Oct 2020).
- 4 Office for National Statistics. Unemployment rate (aged 16 and over, seasonally adjusted) - 13th October. 2020.<https://www.ons.gov.uk/employmentandlabourmarket/peoplenotinwork/unemployment/timeseries/mgsx/lms> (accessed 28 Oct 2020).
- 5 International Labour Organization. COVID-19 and the world of work: Impact and policy responses. 2020. [https://www.ilo.org/wcmsp5/groups/public/---dgreports/---dcomm/documents/briefingnote/wcms\\_738753.pdf](https://www.ilo.org/wcmsp5/groups/public/---dgreports/---dcomm/documents/briefingnote/wcms_738753.pdf) (accessed 15 Oct 2020).
- 6 Office for National Statistics. Labour market economic analysis, quarterly - September 2020. 2020.<https://www.ons.gov.uk/employmentandlabourmarket/peopleinwork/employmentandemployeetypes/articles/labourmarketeconomicanalysisquarterly/latest> (accessed 29 Oct 2020).
- 7 Office for National Statistics. Early insights of how the coronavirus (COVID-19) pandemic impacted the labour market . <https://www.ons.gov.uk/employmentandlabourmarket/peopleinwork/employmentande>

- employeetypes/articles/earlyinsightsofhowthecoronaviruscovid19pandemicimpactedthel  
abourmarket/july2020 (accessed 29 Sep 2020).
- 8 Office for National Statistics. Labour market overview, UK: October 2020 .  
2020.<https://www.ons.gov.uk/employmentandlabourmarket/peopleinwork/employmentandemployeetypes/bulletins/uklabourmarket/october2020> (accessed 15 Oct 2020).
  - 9 Davies AR, Homolova L, Grey CNB, *et al.* Health and mass unemployment events-  
developing a framework for preparedness and response. *J Public Heal (United  
Kingdom)* 2019;**41**:665–73.
  - 10 Bell DNF, Blanchflower DG. UK Unemployment in the Great Recession. *Natl Inst  
Econ Rev* 2010;**214**:R3–25.
  - 11 Lee A, Cho J. The impact of epidemics on labor market: identifying victims of the  
Middle East Respiratory Syndrome in the Korean labor market. *Int J Equity Health*  
2016;**15**:1–15.
  - 12 Wilson T, Cockett J, Papoutsaki D, *et al.* Getting Back to Work .  
2020.<https://www.employment-studies.co.uk/resource/getting-back-work-0> (accessed  
29 Sep 2020).
  - 13 Gardiner L, Slaughter H. The effects of the coronavirus crisis on workers Flash  
findings from the Resolution Foundation’s coronavirus survey. 2020.  
[https://www.resolutionfoundation.org/app/uploads/2020/05/The-effect-of-the-  
coronavirus-crisis-on-workers.pdf](https://www.resolutionfoundation.org/app/uploads/2020/05/The-effect-of-the-coronavirus-crisis-on-workers.pdf) (accessed 29 Sep 2020).
  - 14 Davies AR, Sharp CA, Homolova L, *et al.* *Population health in a digital age The use  
of digital technology to support and monitor health in Wales.* 2019.  
<http://www.nationalarchives.gov.uk/doc/open-government-licence/version/3/> (accessed

- 15 Oct 2020).
- 15 Office for National Statistics. Labour Force Survey .  
<https://www.ons.gov.uk/surveys/informationforhouseholdsandindividuals/householdandindividualsurveys/labourforcesurvey> (accessed 29 Oct 2020).
  - 16 Office for National Statistics. Population estimates.  
<https://www.ons.gov.uk/peoplepopulationandcommunity/populationandmigration/populationestimates> (accessed 28 Sep 2020).
  - 17 Vives A, González F, Moncada S, *et al.* Measuring precarious employment in times of crisis: The revised Employment Precariousness Scale (EPRES) in Spain. *Gac Sanit* 2015;**29**:379–82.
  - 18 Office for National Statistics. Standard Occupational Classification - SOC 2020 .  
2020.  
<https://www.ons.gov.uk/methodology/classificationsandstandards/standardoccupationalclassification/soc/soc2020> (accessed 29 Oct 2020).
  - 19 Welsh Government. Welsh Index of Multiple Deprivation. <https://gov.wales/welsh-index-multiple-deprivation> (accessed 28 Sep 2020).
  - 20 Welsh Government. National Survey for Wales . <https://gov.wales/national-survey-wales> (accessed 29 Oct 2020).
  - 21 The Warwick-Edinburgh Mental Wellbeing Scale (WEMWBS).  
<https://warwick.ac.uk/fac/sci/med/research/platform/wemwbs> (accessed 29 Oct 2020).
  - 22 Welsh Government. Leading Wales out of the coronavirus pandemic A framework for recovery. 2020. <https://gov.wales/sites/default/files/publications/2020-04/leading-wales-out-of-the-coronavirus-pandemic.pdf> (accessed 13 Oct 2020).



- 23 Welsh Government. Coronavirus Job Retention Scheme and Self-Employment Income Support Scheme statistics: up to 30 June 2020 | <https://gov.wales/coronavirus-job-retention-scheme-and-self-employment-income-support-scheme-statistics-30-june-2020> (accessed 29 Sep 2020).
- 24 Office for National Statistics. Coronavirus and the latest indicators for the UK economy and society - 23 July 2020.  
<https://www.ons.gov.uk/peoplepopulationandcommunity/healthandsocialcare/conditionsanddiseases/bulletins/coronavirustheukconomyandsocietyfasterindicators/23july2020> (accessed 29 Sep 2020).
- 25 Bambra C, Riordan R, Ford J, *et al.* The COVID-19 pandemic and health inequalities. *J Epidemiol Community Health* 2020;**74**:964–8.
- 26 Lowcock EC, Rosella LC, Foisy J, *et al.* The social determinants of health and pandemic h1n1 2009 influenza severity. *Am J Public Health* 2012;**102**:51–8.
- 27 Paul KI, Moser K. Unemployment impairs mental health: Meta-analyses. *J Vocat Behav* 2009;**74**:264–82.
- 28 Bartelink VHM, Zay Ya K, Guldbrandsson K, *et al.* Unemployment among young people and mental health: A systematic review. *Scand. J. Public Health*. 2020;**48**:544–58.
- 29 Vancea M, Utzet M. How unemployment and precarious employment affect the health of young people: A scoping study on social determinants. *Scand J Public Health* 2017;**45**:73–84.
- 30 Phillips JA, Nugent CN. Suicide and the Great Recession of 2007-2009: The role of economic factors in the 50 U.S. states. *Soc Sci Med* 2014;**116**:22–31.

- 31 Drydakakis N. The effect of unemployment on self-reported health and mental health in Greece from 2008 to 2013: A longitudinal study before and during the financial crisis. *Soc Sci Med* 2015;**128**:43–51.
- 32 Kaspersen SL, Pape K, Vie G, *et al.* Health and unemployment: 14 Years of follow-up on job loss in the Norwegian HUNT Study. *Eur J Public Health* 2016;**26**:312–7.
- 33 Tinson A. Living in poverty was bad for your health before COVID-19. 2020. [https://www.health.org.uk/sites/default/files/2020-07/Living in poverty was bad for your health before COVID-19.pdf](https://www.health.org.uk/sites/default/files/2020-07/Living%20in%20poverty%20was%20bad%20for%20your%20health%20before%20COVID-19.pdf) (accessed 28 Sep 2020).
- 34 Marmot M. Health equity in England: The Marmot review 10 years on. *BMJ* 2020;**368**:m693.
- 35 Aceves-Martins M, Cruickshank M, Fraser C, *et al.* Child food insecurity in the UK: a rapid review. *Public Heal Res* 2018;**6**:1–162.
- 36 Lai ETC, Wickham S, Law C, *et al.* Poverty dynamics and health in late childhood in the UK: Evidence from the Millennium Cohort Study. *Arch Dis Child* 2019;**104**:1049–55.
- 37 Kim TJ, Von Dem Knesebeck O. Is an insecure job better for health than having no job at all? A systematic review of studies investigating the health-related risks of both job insecurity and unemployment. *BMC Public Health* 2015;**15**:985.
- 38 Kim TJ, von dem Knesebeck O. Perceived job insecurity, unemployment and depressive symptoms: a systematic review and meta-analysis of prospective observational studies. *Int Arch Occup Environ Health* 2016;**89**:561–73.
- 39 Karanikolos M, Mladovsky P, Cylus J, *et al.* Financial crisis, austerity, and health in Europe. *Lancet*. 2013;**381**:1323–31.

**Table 1. Changes in Employment Status by Socio-demographics**

|                               | No Change in<br>Employment Status<br>(%) | Change in<br>Employment<br>(%) | Now<br>Unemployed<br>(%) |
|-------------------------------|------------------------------------------|--------------------------------|--------------------------|
| <b>All</b>                    | 91.0                                     | 5.9                            | 3.1                      |
| <b>Gender</b>                 |                                          |                                |                          |
| Male                          | 91.6                                     | 5.2                            | 3.2                      |
| Female                        | 90.5                                     | 6.8                            | 2.8                      |
| $\chi^2$                      | 0.546                                    | 1.480                          | 0.210                    |
| p-value                       | 0.460                                    | 0.224                          | 0.647                    |
| <b>Age Group</b>              |                                          |                                |                          |
| 18-29 years                   | 88.7                                     | 7.0                            | 4.1                      |
| 30-39 years                   | 91.0                                     | 5.8                            | 2.9                      |
| 40-49 years                   | 90.8                                     | 6.0                            | 2.8                      |
| 50-59 years                   | 91.4                                     | 5.4                            | 2.9                      |
| 60-64 years                   | 95.8                                     | 3.4                            | 1.7                      |
| $\chi^2$                      | 5.456                                    | 2.243                          | 2.042                    |
| p-value                       | 0.244                                    | 0.691                          | 0.728                    |
| <b>Deprivation</b>            |                                          |                                |                          |
| Quintile 1 (High Deprivation) | 92.7                                     | 4.3                            | 3.1                      |
| Quintile 2                    | 91.0                                     | 5.8                            | 3.2                      |
| Quintile 3                    | 91.2                                     | 6.5                            | 2.3                      |
| Quintile 4                    | 86.6                                     | 8.1                            | 5.3                      |
| Quintile 5 (Low Deprivation)  | 93.4                                     | 4.5                            | 2.1                      |
| $\chi^2$                      | 8.412                                    | 4.449                          | 5.190                    |
| p-value                       | 0.078                                    | 0.349                          | 0.268                    |

Proportions are weighted based on mid-year 2018 population estimates.

**Table 2. Changes in Employment Status Regression Model (by Socio-demographics)**

|                               | No Change in<br>Employment<br>Status | Change in<br>Employment | Now<br>Unemployed | Furloughed              |
|-------------------------------|--------------------------------------|-------------------------|-------------------|-------------------------|
| <b>Gender</b>                 |                                      |                         |                   |                         |
| Male                          | Reference                            | Reference               | Reference         | Reference               |
| Female                        | 0.84 [0.57-1.23]                     | 1.41 [0.88-2.26]        | 0.85 [0.44-1.62]  | 0.81 [0.62-1.06]        |
| <b>Age Group</b>              |                                      |                         |                   |                         |
| 18-29 years                   | 0.74 [0.43-1.30]                     | 1.17 [0.60-2.27]        | 1.70 [0.65-4.48]  | <b>3.01 [1.99-4.57]</b> |
| 30-39 years                   | 0.96 [0.53-1.75]                     | 0.98 [0.48-1.98]        | 1.18 [0.41-3.35]  | 1.34 [0.86-2.08]        |
| 40-49 years                   | Reference                            | Reference               | Reference         | Reference               |
| 50-59 years                   | 1.08 [0.58-2.01]                     | 0.86 [0.41-1.79]        | 1.09 [0.37-3.23]  | 1.22 [0.77-1.95]        |
| 60-64 years                   | 2.05 [0.77-5.46]                     | 0.48 [0.15-1.54]        | 0.53 [0.09-3.12]  | <b>2.02 [1.17-3.47]</b> |
| <b>Deprivation</b>            |                                      |                         |                   |                         |
| Quintile 1 (High Deprivation) | 0.85 [0.42-1.74]                     | 0.98 [0.41-2.33]        | 1.66 [0.49-5.69]  | <b>1.82 [1.14-2.90]</b> |
| Quintile 2                    | 0.66 [0.34-1.28]                     | 1.38 [0.62-3.07]        | 1.80 [0.55-5.92]  | <b>1.67 [1.06-2.64]</b> |
| Quintile 3                    | 0.68 [0.34-1.35]                     | 1.55 [0.70-3.44]        | 1.25 [0.35-4.55]  | <b>1.85 [1.16-2.95]</b> |
| Quintile 4                    | <b>0.43 [0.22-0.83]</b>              | 1.97 [0.90-4.30]        | 2.89 [0.91-9.18]  | <b>1.80 [1.12-2.89]</b> |
| Quintile 5 (Low Deprivation)  | Reference                            | Reference               | Reference         | Reference               |

Data reported as adjusted Odds Ratios (aOR) for socio-demographic variables (age, gender, deprivation quintile) and 95% Confidence Intervals. Bold figures denote significant observations ( $p < 0.05$ ).

**Table 3. Changes in Employment Status by Wider Determinants and Health Status**

|                                   | No Change in<br>Employment Status<br>(%) | Change in<br>Employment<br>(%) | Now<br>Unemployed<br>(%) |
|-----------------------------------|------------------------------------------|--------------------------------|--------------------------|
| <b>All</b>                        | 91.0                                     | 5.9                            | 3.1                      |
| <b>Employment Hierarchy</b>       |                                          |                                |                          |
| Job Skill Level 1 (Low Skill)     | 94.2                                     | 3.8                            | 1.9                      |
| Job Skill Level 2                 | 87.8                                     | 6.7                            | 5.5                      |
| Job Skill Level 3                 | 90.7                                     | 7.6                            | 2.0                      |
| Job Skill Level 4 (High Skill)    | 93.8                                     | 4.2                            | 2.0                      |
| $\chi^2$                          | <b>10.828</b>                            | 5.177                          | <b>11.569</b>            |
| p-value                           | <b>0.013</b>                             | 0.159                          | <b>0.009</b>             |
| <b>Household Total Income</b>     |                                          |                                |                          |
| Always Covers Basic Needs         | 92.0                                     | 5.8                            | 2.2                      |
| Does Not Always Cover Basic Needs | 75.3                                     | 8.2                            | 16.7                     |
| $\chi^2$                          | <b>27.024</b>                            | 0.860                          | <b>54.475</b>            |
| p-value                           | <b>&lt;0.001</b>                         | 0.354                          | <b>&lt;0.001</b>         |
| <b>Family Unit</b>                |                                          |                                |                          |
| No Child in Household             | 90.8                                     | 6.9                            | 2.5                      |
| Child in Household                | 91.5                                     | 4.4                            | 4.2                      |
| $\chi^2$                          | 0.223                                    | 3.176                          | 3.032                    |
| p-value                           | 0.637                                    | 0.075                          | 0.082                    |
| <b>Health Status</b>              |                                          |                                |                          |
| No Pre-Existing Condition         | 92.4                                     | 4.6                            | 3.0                      |
| Not Sure                          | 92.8                                     | 4.4                            | 2.9                      |
| Pre-Existing Condition            | 88.2                                     | 8.8                            | 3.1                      |
| $\chi^2$                          | <b>6.332</b>                             | <b>8.963</b>                   | 0.007                    |
| p-value                           | <b>0.042</b>                             | <b>0.011</b>                   | 0.996                    |
| <b>General Health Status</b>      |                                          |                                |                          |
| Good or better                    | 91.1                                     | 6.2                            | 2.6                      |
| Not good                          | 90.5                                     | 4.7                            | 4.7                      |
| $\chi^2$                          | 0.09                                     | 0.821                          | 3.024                    |
| p-value                           | 0.764                                    | 0.365                          | 0.082                    |
| <b>Mental Health</b>              |                                          |                                |                          |
| Average Mental Wellbeing          | 91.7                                     | 6.1                            | 2.3                      |
| Low Mental Wellbeing              | 87.4                                     | 2.1                            | 10.5                     |
| $\chi^2$                          | 2.904                                    | 3.771                          | <b>28.233</b>            |
| p-value                           | 0.088                                    | 0.052                          | <b>&lt;0.001</b>         |

Proportions are weighted based on mid-year 2018 population estimates. Bold figures denote significant observations ( $p < 0.05$ ).

**Table 4. Changes in Employment Status Regression Model (by Wider Determinants and Health Status)**

|                                   | No Change in Employment Status | Change in Employment    | Now Unemployed            | Furloughed               |
|-----------------------------------|--------------------------------|-------------------------|---------------------------|--------------------------|
| <b>Employment Hierarchy</b>       |                                |                         |                           |                          |
| Job Skill Level 4                 | Reference                      | Reference               | Reference                 | Reference                |
| Job Skill Level 3                 | 0.73 [0.41-1.30]               | 1.83 [0.99-3.36]        | 1.11 [0.39-3.18]          | <b>3.56 [2.40-5.30]</b>  |
| Job Skill Level 2                 | <b>0.45 [0.28-0.73]</b>        | 1.62 [0.90-2.92]        | <b>3.41 [1.29-7.83]</b>   | <b>4.35 [2.98-6.36]</b>  |
| Job Skill Level 1                 | 0.62 [0.36-1.06]               | 1.10 [0.27-4.45]        | 1.16 [0.14-9.84]          | <b>6.75 [3.35-13.61]</b> |
| <b>Household Total Income</b>     |                                |                         |                           |                          |
| Always Covers Basic Needs         | Reference                      | Reference               | Reference                 | Reference                |
| Does Not Always Cover Basic Needs | <b>0.26 [0.15-0.44]</b>        | 1.34 [0.58-3.10]        | <b>10.76 [5.16-22.43]</b> | <b>2.54 [1.89-3.41]</b>  |
| <b>Family Unit</b>                |                                |                         |                           |                          |
| No Child in Household             | Reference                      | Reference               | Reference                 | Reference                |
| Child in Household                | 1.12 [0.72-1.76]               | <b>0.51 [0.29-0.91]</b> | <b>2.38 [1.16-4.88]</b>   | 1.20 [0.88-1.65]         |
| <b>Health Status</b>              |                                |                         |                           |                          |
| No Pre-Existing Condition         | Reference                      | Reference               | Reference                 | Reference                |
| Pre-Existing Condition            | <b>0.58 [0.39-0.87]</b>        | <b>2.02 [1.26-3.26]</b> | 1.14 [0.57-2.28]          | <b>1.46 [1.09-1.95]</b>  |
| Not Sure                          | 1.02 [0.38-2.72]               | 1.02 [0.30-3.46]        | 0.92 [0.19-4.43]          | 1.09 [0.60-2.00]         |
| <b>General Health Status</b>      |                                |                         |                           |                          |
| Good or better                    | Reference                      | Reference               | Reference                 | Reference                |
| Not good                          | 0.89 [0.55-1.43]               | 0.75 [0.39-1.42]        | <b>2.05 [1.02-4.14]</b>   | 0.76 [0.54-1.09]         |
| <b>Mental Health</b>              |                                |                         |                           |                          |
| Average Mental Wellbeing          | Reference                      | Reference               | Reference                 | Reference                |
| Low Mental Wellbeing              | 0.68 [0.39-1.18]               | <b>0.28 [0.08-0.95]</b> | <b>5.14 [2.57-10.29]</b>  | 1.26 [0.82-1.93]         |

Data reported as adjusted Odds Ratios (aOR) for demographic variables (age, gender, deprivation quintile) and 95% Confidence Intervals. Bold figures denote significant observations ( $p < 0.05$ ).

**Figure 1. Adjusted proportions (estimated marginal means and 95% CI) of individuals placed on furlough since Feb 2020 by (A) socio-demographics, (B) wider determinants and (C) health status.**

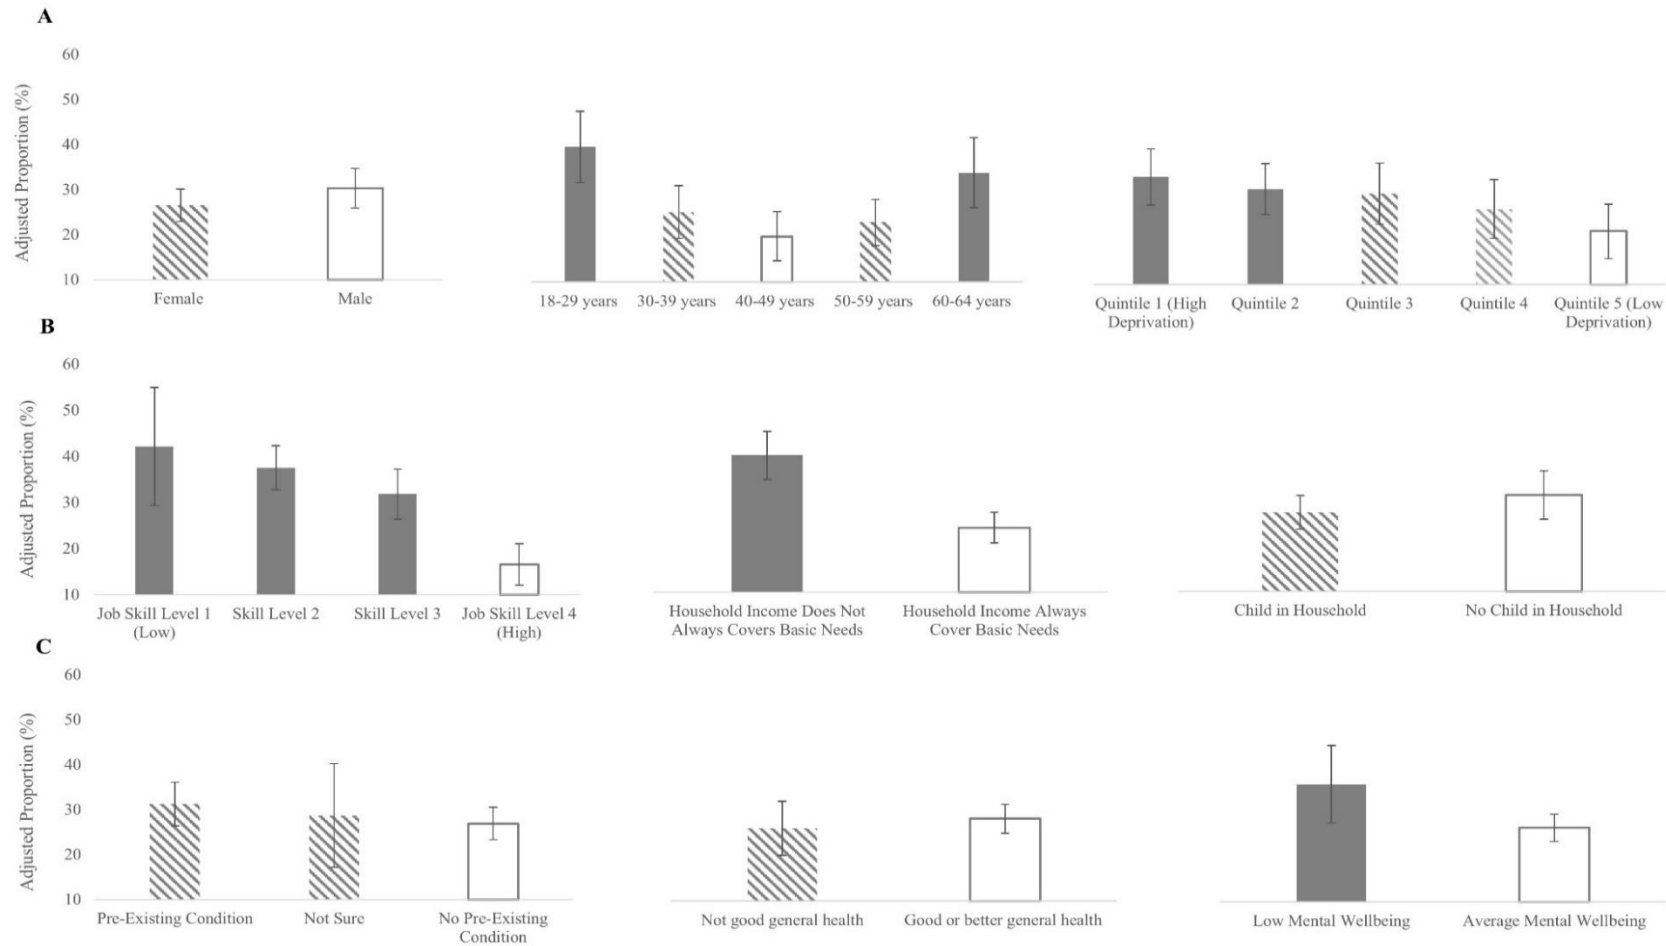

Solid bars indicate a significant difference ( $p < 0.05$ ) from reference (clear bar); striped bars indicate no significant difference.

**Supplementary Table A. Measures for variables included in the national survey**

| <b>Measure</b>                            | <b>Source</b>                                                              | <b>Classification</b>                                                                                                                                                                                                                                                                                                                                                                                                                                                                                                                                                                                                                                                                                                                                                                                                                                                                                                                                                                                                                                                                                                                                                                                                                                                                                                      |
|-------------------------------------------|----------------------------------------------------------------------------|----------------------------------------------------------------------------------------------------------------------------------------------------------------------------------------------------------------------------------------------------------------------------------------------------------------------------------------------------------------------------------------------------------------------------------------------------------------------------------------------------------------------------------------------------------------------------------------------------------------------------------------------------------------------------------------------------------------------------------------------------------------------------------------------------------------------------------------------------------------------------------------------------------------------------------------------------------------------------------------------------------------------------------------------------------------------------------------------------------------------------------------------------------------------------------------------------------------------------------------------------------------------------------------------------------------------------|
| <b>Employment skill level (Hierarchy)</b> | Office for National Statistics – SOC 2020 <sup>1</sup>                     | <p><b>Employment Skill Level 4</b> (<i>Corporate managers and directors; Science, research, engineering and technology professionals; Health professionals; Teaching and other educational professionals; Business, media and public service professionals</i>)</p> <p><b>Employment Skill Level 3</b> (<i>Other managers and proprietors; Science, engineering and technology associate professionals; Health and social care associate professionals; Protective service occupations; Culture, media and sports occupations; Business and public service associate professionals; Skilled agricultural and related trades; Skilled metal, electrical and electronic trades; Skilled construction and building trades; Textiles, printing and other skilled trades</i>)</p> <p><b>Employment Skill Level 2</b> (<i>Administrative occupations; Secretarial and related occupations; Caring personal service occupations; Leisure, travel and related personal occupations; Community and civil enforcement occupations; Sales occupations; Customer service occupations; Process, plant and machine operatives; Transport and mobile machine drivers and operatives</i>)</p> <p><b>Employment Skill Level 1</b> (<i>Elementary trades and related occupations; Elementary administration and service occupations</i>)</p> |
| <b>Pre-existing (health) condition</b>    | National Survey for Wales <sup>2</sup>                                     | Do you have any physical or mental health conditions or illnesses lasting or expected to last for 12 months or more?<br><b>Yes/No/Not Sure</b>                                                                                                                                                                                                                                                                                                                                                                                                                                                                                                                                                                                                                                                                                                                                                                                                                                                                                                                                                                                                                                                                                                                                                                             |
| <b>General health</b>                     | National Survey for Wales <sup>2</sup>                                     | How is your health in general? Is it...<br><b>Good or better general health</b> ( <i>good, very good</i> )<br><b>Not good general health</b> ( <i>fair, poor, very poor</i> )                                                                                                                                                                                                                                                                                                                                                                                                                                                                                                                                                                                                                                                                                                                                                                                                                                                                                                                                                                                                                                                                                                                                              |
| <b>Mental Wellbeing</b>                   | The Warwick-Edinburgh Mental Wellbeing Scales [short version] <sup>3</sup> | Raw scores were converted into metric scores and categorised as <b>Average</b> or <b>Low Mental Wellbeing</b> .                                                                                                                                                                                                                                                                                                                                                                                                                                                                                                                                                                                                                                                                                                                                                                                                                                                                                                                                                                                                                                                                                                                                                                                                            |
| <b>Household Income</b>                   | Employment Precariousness Scale (EPRES) <sup>4</sup>                       | Does your total household income allow you to cover your basic needs? (food, shelter and warmth)<br><b>Always covers basic needs</b> ( <i>always</i> )<br><b>Does not cover basic needs</b> ( <i>most of the time, sometimes, rarely, never</i> )                                                                                                                                                                                                                                                                                                                                                                                                                                                                                                                                                                                                                                                                                                                                                                                                                                                                                                                                                                                                                                                                          |
| <b>Child(ren) in household</b>            | Internal Question                                                          | How many children live with you in the following age bands? (enter a number)<br>a) 0-1 year old; b) 2-4 years old; c) Primary school age (5-10 years old); d) Secondary school age (11-17 years old)<br><b>No child(ren) in household</b> ( <i>total is zero</i> )<br><b>Child(ren) in household</b> ( <i>total is one or more</i> )                                                                                                                                                                                                                                                                                                                                                                                                                                                                                                                                                                                                                                                                                                                                                                                                                                                                                                                                                                                       |

<sup>1</sup> <https://www.ons.gov.uk/methodology/classificationsandstandards/standardoccupationalclassificationsoc/soc2020>

<sup>2</sup> <https://gov.wales/national-survey-wales>

<sup>3</sup> <https://warwick.ac.uk/fac/sci/med/research/platform/wemwbs>

<sup>4</sup> Vives A, González F, Moncada S, Llorens C, Benach J. Measuring precarious employment in times of crisis: the revised Employment Precariousness Scale (EPRES) in Spain. *Gac Sanit.* 2015 Sep-Oct;29(5):379-82.



**Supplementary Table B. Sample Population(s) and Welsh Population Estimates (mid-year 2018) Comparisons**

|                               | Survey Population |      | 'In Paid Employment' Population |      | Welsh Population |      |
|-------------------------------|-------------------|------|---------------------------------|------|------------------|------|
|                               | n                 | %    | n                               | %    | n                | %    |
| All                           | 1379              |      | 1229                            |      | 1,856,853        |      |
| Males                         | 542               | 39.3 | 461                             | 37.5 | 924,020          | 49.8 |
| Females                       | 823               | 59.7 | 756                             | 61.5 | 932, 833         | 50.2 |
| Not Provided                  | 14                | 1.0  | 12                              | 1.0  |                  |      |
| 18-29 Years                   | 157               | 11.4 | 149                             | 12.1 | 485,909          | 26.2 |
| 30-39 Years                   | 271               | 19.7 | 257                             | 20.9 | 371,851          | 20.0 |
| 40-49 Years                   | 338               | 24.5 | 299                             | 24.3 | 375,526          | 20.2 |
| 50-59 Years                   | 416               | 30.2 | 359                             | 29.2 | 433,915          | 23.4 |
| 60-64 Years                   | 177               | 12.8 | 147                             | 12.0 | 189,652          | 10.2 |
| Not Provided                  | 20                | 1.4  | 18                              | 1.5  |                  |      |
| Quintile 1 (High Deprivation) | 258               | 18.7 | 239                             | 19.4 | 371,014          | 20.0 |
| Quintile 2                    | 326               | 23.6 | 275                             | 22.4 | 370,637          | 20.0 |
| Quintile 3                    | 228               | 16.5 | 185                             | 15.1 | 384,927          | 20.7 |
| Quintile 4                    | 254               | 18.4 | 195                             | 15.9 | 370,242          | 19.9 |
| Quintile 5 (Low Deprivation)  | 313               | 22.7 | 254                             | 20.7 | 360,033          | 19.4 |
